# Supplementary material
Source: PubMed Central journal article supplement (PMC7471366)
Supplement: ajcr0010-2337-f9.pdf [file ajcr0010-2337-f9.pdf]

# Ovatodiolide inhibits colon cancer via targeting tumor sphere-derived exosomes

**Supplementary Table 1.** List of qPCR primers

| Gene                   | Primer Sequences        |
|------------------------|-------------------------|
| Human CD206-F          | TTGCACTTTGAGGGAAGGGA    |
| Human CD206-R          | CCTTGCCTGATGCCAGGTTA    |
| Human TNF- $\alpha$ -F | CCTGTAGCCCACGTCGTAGC    |
| Human TNF- $\alpha$ -R | AGCAATGACTCCAAAGTAGACC  |
| Human IL-1 $\beta$ -F  | CCACAGACCTTCCAGGAGAATG  |
| Human IL-1 $\beta$ -R  | GTGCAGTTCAGTGATCGTACAGG |
| Human TGF- $\beta$ 1-F | TACCTGAACCCGTGTTGCTCTC  |
| Human TGF- $\beta$ 1-R | GTTGCTGAGGTATCGCCAGGAA  |
| Human RPLP0-F          | TGGTCATCCAGCAGGTGTTCTGA |
| Human RPLP0-R          | ACAGACACTGGCAACATTGCGG  |

F: forward primer; R: reverse primer.

**Supplementary Table 2.** List of primary antibodies used in this study

| No. | Target           | Dilution | Company and Catalog No.                                   | Predicted MW (kDa) | Observed MW (kDa) |
|-----|------------------|----------|-----------------------------------------------------------|--------------------|-------------------|
| 01  | $\beta$ -actin   | 1:5000   | Proteintech, $\beta$ -actin Rabbit pAb, 20536-1-AP        | 42                 | 42                |
| 02  | Akt              | 1:1000   | Cell Signaling, Akt Rabbit mAb, #9272                     | 60                 | 60                |
| 03  | $\beta$ -catenin | 1:800    | Cell Signaling, $\beta$ -Catenin (6B3) Rabbit mAb, #9582P | 92                 | 100               |
| 04  | mTOR             | 1:800    | Cell Signaling, mTOR (7C10) Rabbit mAb, #2983             | 289                | 289               |
| 05  | STAT3            | 1:600    | Proteintech, STAT3 Rabbit pAb, 10253-1-AP                 | 79-86              | 79-86~100         |
| 06  | TGF $\beta$ 1    | 1:1000   | Proteintech, TGF $\beta$ 1 Rabbit pAb, 18978-1-AP         | 43                 | 44                |
| 07  | CD63             | 1:600    | Abcam, CD63 Rabbit pAb, ab216130                          | 26                 | 40                |
| 08  | CD9              | 1:1000   | Abcam, CD9 (EPR2949) Rabbit mAb, ab92726                  | 25                 | 40                |
| 09  | CD44             | 1:1000   | Invitrogen, CD44 Mouse mAb, MA5-13890                     | 81                 | 81                |
| 10  | Vimentin         | 1:1000   | Cloud Clone, Vimentin Rabbit pAb, PAB040Hu01              | 52-58              | 52-58             |
| 11  | Snail            | 1:600    | Abclonal, Snail Rabbit pAb, A5544                         | 29-35              | 29-35             |
| 12  | CD133            | 1:1000   | Abcam, CD133 Rabbit pAb, ab19898                          | 123                | 123               |
| 13  | E-cadherin       | 1:1000   | Proteintech, E-cadherin Rabbit pAb, 20874-1-AP            | 97                 | 125               |
| 14  | IL-6             | 1:1000   | Proteintech, IL-6 Rabbit pAb, 21865-1-AP                  | 24-30              | 24-30             |
| 15  | Alix             | 1:1000   | Abcam, Alix Rabbit pAb, ab76608                           | 96                 | 96                |
| 16  | P-STAT3          | 1:600    | Cellsignal, p-STAT3 Rabbit mAb, #9145s                    | 79-86              | 79-86             |
